# Supplementary material for: The Survival Impact of Second Primary Lung Cancer in Patients With Lung Cancer
Source: PubMed Central journal article supplement — J Natl Cancer Inst. 2021 Dec 10;114(4):618–25. doi: 10.1093/jnci/djab224 (PMC9002287; doi:10.1093/jnci/djab224), 2021-12-10

# Supplementary Materials

## CONTENTS

### **Supplementary Tables**

Supplementary Table 1. Surgery Procedure at Initial Diagnosis of Lung Cancer in SEER

Supplementary Table 2. Multivariable Cox Regression for Evaluating an Association between Overall Survival and SPLC diagnosis (versus Single Primary Lung Cancer) in SEER

Supplementary Table 3. Multivariable Cox Regression for Evaluating an Association between Lung Cancer-Specific Survival and SPLC diagnosis (versus Single Primary Lung Cancer) in SEER

Supplementary Table 4. Evaluation of an Association between SPLC and Lung Cancer-Specific Survival Stratified by Subgroups for Assessing Effect Modification

Supplementary Table 5. Sensitivity Analysis for Evaluation of an Association between SPLC and Survival Stratified by Subgroups for Assessing Effect Modification after Excluding Patients with Advanced-Stage IPLC

Supplementary Table 6. All Patients with Surgery for IPLC in MEC from 1993 to 2017, Stratified by SPLC versus Single Primary Lung Cancer

Supplementary Table 7. Multivariable Cox Regression for Evaluating an Association between Overall Survival and SPLC diagnosis (versus Single Primary Lung Cancer) in MEC

Supplementary Table 8. Multivariable Cox Regression for Evaluating an Association between Lung Cancer-Specific Survival and SPLC diagnosis (versus Single Primary Lung Cancer) in MEC

Supplementary Table 9. Sensitivity Analysis for Evaluating an Association Between SPLC and Survival Stratified by Smoking-Related Subgroups for Assessing Effect Modification in the MEC

### **Supplementary Figures**

Supplementary Figure 1. Cohort Selection Criteria from SEER database and MEC

Supplementary Figure 2. Histogram for Time from IPLC to SPLC diagnosis in SEER

Supplementary Figure 3. Adjusted Survival Curves for Overall and Lung Cancer-Specific Mortality among Patients with SPLC versus Single Primary Lung Cancer in SEER

Supplementary Figure 4. Stratified Analysis by IPLC diagnosis age: Adjusted Survival Curves for Overall Mortality among Patients with SPLC versus Single Primary Lung Cancer in SEER

Supplementary Figure 5. Stratified Analysis by IPLC Histology: Adjusted Survival Curves for Overall Mortality among Patients with SPLC versus Single Primary Lung Cancer in SEER

Supplementary Figure 6. Sensitivity Analysis for Forest Plot of Association between Survival and SPLC diagnosis (versus Single Primary Lung Cancer) after Excluding Patients with Advanced-Stage IPLC in Multivariable Cox Regression in SEER and MEC

Supplementary Figure 7. Adjusted Survival Curves for Overall and Lung Cancer-Specific Mortality among Patients with SPLC versus Single Primary Lung Cancer in the MEC

Supplementary Figure 8. Stratified Analysis by Smoking Status at Initial Diagnosis: Adjusted Survival Curves for Overall among Patients with SPLC versus Single Primary Lung Cancer, Stratified by Smoking Status, in the MEC

## Supplementary Table

**Supplementary Table 1. Surgery Procedure at Initial Diagnosis of Lung Cancer in SEER (N=138,969)**

| Surgical Procedures                                                    | Case (%)        |
|------------------------------------------------------------------------|-----------------|
| Local surgical excision or destruction of lesion                       | 756 (0.54)      |
| Partial/wedge/segmental resection, partial lobectomy, sleeve resection | 24639 (17.72)   |
| Lobectomy/bilobectomy without dissection of lymph nodes                | 101,544 (73.07) |
| Lobectomy/bilobectomy with dissection of lymph nodes                   | 6,266 (4.51)    |
| Complete/total/standard pneumonectomy                                  | 4,549 (3.27)    |
| Radical pneumonectomy                                                  | 54 (0.03)       |
| Extended radical pneumonectomy                                         | 196 (0.14)      |
| Surgery of regional and/or distant site/node(s)                        | 315 (0.22)      |
| Resection of lung/Not otherwise specified                              | 650 (0.47)      |

**Supplementary Table 2. Multivariable Cox Regression for Evaluating an Association between Overall Survival and SPLC diagnosis (versus Single Primary Lung Cancer) in SEER**

| Characteristics                  | Adjusted Hazard Ratio (95% CI) |
|----------------------------------|--------------------------------|
| <b>SPLC<sup>a</sup></b>          |                                |
| No: Single Primary Lung Cancer   | Reference                      |
| Yes                              | 2.12 (2.06 to 2.17)            |
| Age at IPLC diagnosis            | 1.03 (1.03 to 1.03)            |
| <b>Sex</b>                       |                                |
| Female                           | Reference                      |
| Male                             | 1.37 (1.35 to 1.39)            |
| <b>Stage at IPLC<sup>b</sup></b> |                                |
| Early                            | Reference                      |
| Advanced                         | 2.31 (2.23 to 2.40)            |
| <b>Histology of IPLC</b>         |                                |
| Adenocarcinoma                   | Reference                      |
| Large cell                       | 1.38 (1.33 to 1.43)            |
| Squamous cell                    | 1.25 (1.23 to 1.27)            |
| Small cell                       | 1.85 (1.75 to 1.97)            |
| Non-small cell carcinoma/NOS     | 1.30 (1.26 to 1.35)            |
| Others                           | 0.83 (0.81 to 0.86)            |
| <b>Race</b>                      |                                |
| African American                 | 1.10 (1.07 to 1.13)            |
| Asian/Pacific Islander           | 0.84 (0.82 to 0.87)            |
| Hispanic                         | 0.93 (0.90 to 0.96)            |
| Other                            | 1.14 (1.02 to 1.27)            |
| White                            | Reference                      |

<sup>a</sup>Time-varying predictor for overall survival. IPLC = initial primary lung cancer; NOS = not otherwise specified; SEER = Surveillance, Epidemiology, and End Results Program; SPLC = second primary lung cancer.

<sup>b</sup>Stage of IPLC was defined using SEER summary stage 2000: 'localized' and 'regional' for early stage and 'distant' for advanced stage.

**Supplementary Table 3. Multivariate Cox Regression for Evaluating an Association between Lung Cancer-Specific Survival and SPLC diagnosis in SEER**

| Characteristics                  | Adjusted Hazard Ratio (95% CI) |
|----------------------------------|--------------------------------|
| <b>SPLC<sup>a</sup></b>          |                                |
| No: Single Primary Lung Cancer   | Reference                      |
| Yes                              | 3.20 (3.10 to 3.30)            |
| Age at IPLC diagnosis            | 1.01 (1.01 to 1.02)            |
| <b>Sex</b>                       |                                |
| Female                           | Reference                      |
| Male                             | 1.35 (1.33 to 1.37)            |
| <b>Stage at IPLC<sup>b</sup></b> |                                |
| Early                            | Reference                      |
| Advanced                         | 2.81 (2.70 to 2.93)            |
| <b>Histology of IPLC</b>         |                                |
| Adenocarcinoma                   | Reference                      |
| Large cell                       | 1.39 (1.33 to 1.46)            |
| Squamous cell                    | 1.13 (1.11 to 1.15)            |
| Small cell                       | 2.05 (1.92 to 2.20)            |
| Non-small cell carcinoma/NOS     | 1.31 (1.25 to 1.36)            |
| Others                           | 0.69 (0.67 to 0.72)            |
| <b>Race</b>                      |                                |
| African American                 | 1.08 (1.04 to 1.11)            |
| Asian/Pacific Islander           | 0.94 (0.90 to 0.97)            |
| Hispanic                         | 0.96 (0.92 to 1.01)            |
| Other                            | 1.19 (1.03 to 1.36)            |
| White                            | Reference                      |

<sup>a</sup>Time-varying predictor for overall survival. IPLC = initial primary lung cancer; NOS = not otherwise specified; SEER = Surveillance, Epidemiology, and End Results Program; SPLC = second primary lung cancer.

<sup>b</sup>Stage of IPLC was defined using SEER summary stage 2000: 'localized' and 'regional' for early stage and 'distant' for advanced stage.

**Supplementary Table 4. Evaluation of an association between SPLC and Lung Cancer-Specific Survival Stratified by Subgroups for Assessing Effect Modification (i.e., Interaction)**

| Data source and Subgroup     | Case    | aHR of SPLC <sup>a</sup> (95% CI) | <i>P</i> <sub>interaction</sub> <sup>c</sup> |
|------------------------------|---------|-----------------------------------|----------------------------------------------|
| <b>SEER</b>                  |         |                                   |                                              |
| Stage at IPLC <sup>b</sup>   |         |                                   |                                              |
| Early                        | 133,445 | 3.28 (3.18 to 3.38)               | <.001                                        |
| Advanced                     | 5,524   | 1.55 (1.25 to 1.90)               |                                              |
| Age at IPLC diagnosis        |         |                                   |                                              |
| 0-49 y                       | 7,986   | 3.92 (3.32 to 4.62)               | <.001                                        |
| 50-59 y                      | 22,608  | 3.82 (3.52 to 4.14)               |                                              |
| 60-69 y                      | 45,396  | 3.36 (3.20 to 3.53)               |                                              |
| 70-79 y                      | 48,391  | 2.99 (2.85 to 3.15)               |                                              |
| 80+ y                        | 14,588  | 2.37 (2.12 to 2.64)               |                                              |
| Histology of IPLC            |         |                                   |                                              |
| Small cell                   | 1,970   | 1.70 (1.29 to 2.24)               | <.001                                        |
| Large cell                   | 4,911   | 2.42 (2.09 to 2.80)               |                                              |
| Adenocarcinoma               | 75,738  | 3.03 (2.90 to 3.16)               |                                              |
| Squamous cell                | 35,666  | 3.46 (3.28 to 3.65)               |                                              |
| Non-small cell carcinoma/NOS | 5,721   | 2.94 (2.58 to 3.36)               |                                              |
| Others                       | 14,963  | 3.99 (3.55 to 4.48)               |                                              |
| <b>MEC</b>                   |         |                                   |                                              |
| Smoking Status <sup>d</sup>  |         |                                   |                                              |
| Former/Never                 | 983     | 1.58 (0.99 to 2.50)               | 0.01                                         |
| Current                      | 557     | 3.14 (1.83 to 5.36)               |                                              |

<sup>a</sup>Time-varying predictor for overall survival. aHR, adjusted hazard ratio; IPLC, initial primary lung cancer; NOS, not otherwise specified; SEER, Surveillance, Epidemiology, and End Results Program; SPLC, second primary lung cancer.

<sup>b</sup>Stage of IPLC was defined using SEER summary stage 2000: 'localized' and 'regional' for early stage and 'distant' for advanced stage.

<sup>c</sup>2-sided likelihood ratio test comparing models with and without interaction with SPLC.

<sup>d</sup>Assessment of smoking status was collected at baseline, and updated using 10-year follow-up, if prior to IPLC diagnosis.

**Supplementary Table 5. Sensitivity Analysis for Evaluation of an Association between SPLC and Survival Stratified by Subgroups for Assessing Effect Modification after Excluding Patients with Advanced-Stage IPLC (N=133,445 in SEER; N=1,050 in the MEC)**

| Data Source and Subgroup      | Case   | aHR of SPLC <sup>a</sup> (95% CI) | <i>P</i> <sub>interaction</sub> <sup>c</sup> |
|-------------------------------|--------|-----------------------------------|----------------------------------------------|
| Overall survival              |        |                                   |                                              |
| SEER                          |        |                                   |                                              |
| Stage at IPLC <sup>b</sup>    |        |                                   |                                              |
| Localized                     | 76,452 | 2.39 (2.31 to 2.47)               | <.001                                        |
| Regional                      | 56,993 | 1.86 (1.78 to 1.94)               |                                              |
| Age at IPLC diagnosis         |        |                                   |                                              |
| 0-49 y                        | 7,421  | 3.39 (2.80 to 3.89)               | <.001                                        |
| 50-59 y                       | 21,375 | 2.90 (2.70 to 3.12)               |                                              |
| 60-69 y                       | 43,579 | 2.40 (2.30 to 2.50)               |                                              |
| 70-79 y                       | 46,852 | 1.98 (1.89 to 2.06)               |                                              |
| 80+ y                         | 14,218 | 1.50 (1.36 to 1.65)               |                                              |
| Histology of IPLC             |        |                                   |                                              |
| Small cell                    | 1,874  | 1.56 (1.25 to 1.95)               | <.001                                        |
| Large cell                    | 4,626  | 1.90 (1.67 to 2.16)               |                                              |
| Adenocarcinoma                | 72,896 | 2.12 (2.04 to 2.20)               |                                              |
| Squamous cell                 | 34,446 | 2.22 (2.12 to 2.33)               |                                              |
| Non-small cell carcinoma/NOS  | 5,329  | 2.08 (1.84 to 2.35)               |                                              |
| Others                        | 14,274 | 2.46 (2.22 to 2.73)               |                                              |
| MEC                           |        |                                   |                                              |
| Smoking Status <sup>d</sup>   |        |                                   |                                              |
| Former/Never                  | 893    | 1.52 (1.05 to 2.16)               | 0.18                                         |
| Current                       | 157    | 2.30 (1.46 to 3.64)               |                                              |
| Lung cancer-specific survival |        |                                   |                                              |
| SEER                          |        |                                   |                                              |
| Stage at IPLC <sup>b</sup>    |        |                                   |                                              |
| Localized                     | 76,452 | 4.30 (4.14 to 4.47)               | <.001                                        |
| Regional                      | 56,993 | (2.31 to 2.55)                    |                                              |
| Age at IPLC diagnosis         |        |                                   |                                              |
| 0-49 y                        | 7,421  | 4.23 (3.50 to 5.09)               | <.001                                        |
| 50-59 y                       | 21,375 | 4.10 (3.77 to 4.46)               |                                              |
| 60-69 y                       | 43,579 | 3.55 (3.38 to 3.74)               |                                              |
| 70-79 y                       | 46,852 | 3.17 (3.01 to 3.34)               |                                              |
| 80+ y                         | 14,218 | 2.43 (2.17 to 2.72)               |                                              |
| Histology of IPLC             |        |                                   |                                              |
| Small cell                    | 1,874  | 1.90 (1.43 to 2.52)               | <.001                                        |
| Large cell                    | 4,626  | 2.52 (2.16 to 2.93)               |                                              |
| Adenocarcinoma                | 72,896 | 3.20 (3.06 to 3.34)               |                                              |
| Squamous cell                 | 34,446 | 3.65 (3.45 to 3.86)               |                                              |
| Non-small cell carcinoma/NOS  | 5,329  | 3.15 (2.74 to 3.62)               |                                              |
| Others                        | 14,274 | 4.22 (3.72 to 4.79)               |                                              |
| MEC                           |        |                                   |                                              |
| Smoking Status <sup>d</sup>   |        |                                   |                                              |
| Former/Never                  | 893    | 1.74 (1.10 to 2.75)               | 0.07                                         |
| Current                       | 157    | 3.31 (1.89 to 5.81)               |                                              |

<sup>a</sup>Time-varying predictor for overall survival. aHR, adjusted hazard ratio; IPLC, NOS, not otherwise specified; initial primary lung cancer; SEER, Surveillance, Epidemiology, and End Results Program; SPLC, second primary lung cancer.

<sup>b</sup>Stage of IPLC was defined using SEER summary stage 2000: 'localized' and 'regional' for early stage and 'distant' for advanced stage.

<sup>c</sup>2-sided likelihood ratio test comparing models with and without interaction with SPLC.

<sup>d</sup>Assessment of smoking status was collected at baseline, and updated using 10-year follow-up, if prior to IPLC diagnosis.

**Supplementary Table 6. All Patients with Surgery for IPLC in MEC from 1993 to 2017, Stratified by SPLC versus Single Primary Lung Cancer**

| Characteristics                           | Total<br>(N=1,540) | Patients with SPLC<br>(n=123) | Patients with single<br>primary lung cancer<br>(n=1,417) |
|-------------------------------------------|--------------------|-------------------------------|----------------------------------------------------------|
| Age at IPLC diagnosis                     |                    |                               |                                                          |
| Mean (SD)                                 | 72.8 (7.6)         | 71.7 (7.7)                    | 72.9 (7.6)                                               |
| Age at IPLC diagnosis in groups, No. (%)  |                    |                               |                                                          |
| <60 y                                     | 93 (6.0)           | 9 (7.3)                       | 84 (5.9)                                                 |
| 60-69 y                                   | 399 (25.9)         | 39 (31.7)                     | 360 (25.4)                                               |
| 70-79 y                                   | 782 (50.8)         | 59 (48.0)                     | 723 (51.0)                                               |
| 80+ y                                     | 266 (17.3)         | 16 (13.0)                     | 250 (17.7)                                               |
| Sex, No. (%)                              |                    |                               |                                                          |
| Male                                      | 775 (50.3)         | 61 (49.6)                     | 714 (50.4)                                               |
| Female                                    | 765 (49.7)         | 62 (50.4)                     | 703 (49.6)                                               |
| Race, No. (%)                             |                    |                               |                                                          |
| African American                          | 373 (24.2)         | 24 (19.5)                     | 349 (24.6)                                               |
| Hispanic                                  | 226 (14.7)         | 16 (13.0)                     | 210 (14.8)                                               |
| Japanese American                         | 377 (24.5)         | 32 (26.0)                     | 345 (24.3)                                               |
| Native Hawaiian                           | 83 (5.4)           | 8 (6.5)                       | 75 (5.3)                                                 |
| Other                                     | 86 (5.6)           | 6 (4.9)                       | 80 (5.6)                                                 |
| White                                     | 474 (30.8)         | 37 (30.1)                     | 358 (25.3)                                               |
| Personal history of cancer, No. (%)       |                    |                               |                                                          |
| Yes                                       | 474 (30.8)         | 42 (34.1)                     | 432 (30.5)                                               |
| No                                        | 1,066 (69.2)       | 81 (65.9)                     | 985 (69.5)                                               |
| Stage at IPLC <sup>a</sup> , No. (%)      |                    |                               |                                                          |
| Early                                     | 1,390 (90.3)       | 119 (96.7)                    | 1,271 (89.7)                                             |
| Advanced                                  | 150 (9.7)          | 4 (3.3)                       | 146 (10.3)                                               |
| Histology of IPLC, No. (%)                |                    |                               |                                                          |
| Adenocarcinoma                            | 936 (60.8)         | 76 (61.8)                     | 860 (60.7)                                               |
| Large cell                                | 61 (4.0)           | 7 (5.7)                       | 54 (3.8)                                                 |
| Squamous cell                             | 15 (1.0)           | 31 (25.2)                     | 319 (22.5)                                               |
| Small cell                                | 350 (22.7)         | 0 (0.0)                       | 15 (1.1)                                                 |
| Non-small cell carcinoma/NOS              | 26 (1.7)           | 3 (2.4)                       | 23 (1.6)                                                 |
| Others                                    | 152 (9.9)          | 6 (4.9)                       | 146 (10.3)                                               |
| Radiotherapy for IPLC, No. (%)            |                    |                               |                                                          |
| Yes                                       | 215 (14.0)         | 11 (8.9)                      | 204 (14.4)                                               |
| No                                        | 1,313 (85.3)       | 112 (91.1)                    | 1,201 (84.8)                                             |
| Missing                                   | 12 (0.8)           | 0 (0.0)                       | 12 (0.8)                                                 |
| Chemotherapy for IPLC, No. (%)            |                    |                               |                                                          |
| Yes                                       | 257 (16.7)         | 8 (6.5)                       | 249 (17.6)                                               |
| No/Unknown                                | 1283 (83.3)        | 115 (93.5)                    | 1,168 (82.4)                                             |
| Cause of Death, No. (%)                   |                    |                               |                                                          |
| Alive                                     | 618 (40.1)         | 47 (38.2)                     | 571 (40.3)                                               |
| Lung cancer                               | 581 (37.7)         | 54 (43.9)                     | 527 (37.2)                                               |
| Other                                     | 341 (22.1)         | 22 (17.9)                     | 319 (22.5)                                               |
| Smoking status <sup>b</sup> , No. (%)     |                    |                               |                                                          |
| Never                                     | 233 (15.1)         | 11 (8.9)                      | 222 (15.7)                                               |
| Former                                    | 750 (48.7)         | 60 (48.8)                     | 690 (48.7)                                               |
| Current                                   | 557 (36.2)         | 52 (42.3)                     | 505 (35.6)                                               |
| Smoking intensity (Cigs/day) <sup>b</sup> |                    |                               |                                                          |
| Mean (SD)                                 | 15.0 (10.2)        | 18.4 (10.7)                   | 14.7 (10.1)                                              |
| Smoking pack-years <sup>b</sup>           |                    |                               |                                                          |
| Mean (SD)                                 | 25.1 (19.9)        | 33.0 (21.3)                   | 24.4 (19.6)                                              |
| Smoking quit years <sup>b</sup>           |                    |                               |                                                          |
| Mean (SD)                                 | 6.5 (7.6)          | 5.1 (7.1)                     | 6.6 (7.7)                                                |

<sup>a</sup>Stage of IPLC was defined using SEER summary stage: 'localized' and 'regional' for early stage and 'distant' for advanced stage. IPLC, initial primary lung cancer; MEC, Multiethnic Cohort Study; NOS, not otherwise specified; SD, standard deviation; SPLC, second primary lung cancer.

<sup>b</sup>Assessment of smoking status was collected at baseline, and updated using 10-year follow-up, if prior to IPLC diagnosis.



**Supplementary Table 7. Multivariable Cox Regression for Evaluating an Association between Overall Survival and SPLC diagnosis (versus Single Primary Lung Cancer) in the MEC**

| Characteristics                  | Adjusted Hazard Ratio (95% CI) |
|----------------------------------|--------------------------------|
| <b>SPLC<sup>a</sup></b>          |                                |
| No: Single Primary Lung Cancer   | Reference                      |
| Yes                              | 1.74 (1.31 to 2.28)            |
| Age at IPLC diagnosis            | 1.03 (1.02 to 1.03)            |
| <b>Sex</b>                       |                                |
| Female                           | Reference                      |
| Male                             | 1.53 (1.33 to 1.76)            |
| <b>Stage at IPLC<sup>b</sup></b> |                                |
| Early                            | Reference                      |
| Advanced                         | 3.06 (2.45 to 3.83)            |
| <b>Histology of IPLC</b>         |                                |
| Adenocarcinoma                   | Reference                      |
| Large cell                       | 1.31 (0.85 to 2.03)            |
| Squamous cell                    | 1.08 (0.93 to 1.27)            |
| Small cell                       | 3.22 (1.47 to 7.06)            |
| Non-small cell carcinoma/NOS     | 1.31 (0.80 to 2.15)            |
| Others                           | 0.87 (0.67 to 1.14)            |
| <b>Race</b>                      |                                |
| African American                 | 1.30 (1.08 to 1.56)            |
| Hispanic                         | 0.95 (0.75 to 1.20)            |
| Japanese American                | 0.87(0.71 to 1.05)             |
| Native Hawaiian                  | 0.78 (0.56 to 1.09)            |
| Other                            | 1.20 (0.89 to 1.63)            |
| White                            | Reference                      |

<sup>a</sup>Time-varying predictor for overall survival. IPLC, initial primary lung cancer; MEC, Multiethnic Cohort Study; NOS, not otherwise specified; SPLC, second primary lung cancer.

<sup>b</sup>Stage of IPLC was defined using SEER summary stage: 'localized' and 'regional' for early stage and 'distant' for advanced stage.

**Supplementary Table 8. Multivariable Cox Regression for Evaluating an Association between Lung Cancer-Specific Survival and SPLC diagnosis (versus Single Primary Lung Cancer) in the MEC**

| Characteristics                  | Adjusted Hazard Ratio (95% CI) |
|----------------------------------|--------------------------------|
| <b>SPLC<sup>a</sup></b>          |                                |
| No: Single Primary Lung Cancer   | Reference                      |
| Yes                              | 2.18 (1.56 to 3.05)            |
| Age at IPLC diagnosis            | 1.01 (1.00 to 1.02)            |
| <b>Sex</b>                       |                                |
| Female                           | Reference                      |
| Male                             | 1.51 (1.27 to 1.81)            |
| <b>Stage at IPLC<sup>b</sup></b> |                                |
| Early                            | Reference                      |
| Advanced                         | 3.43 (2.62 to 4.49)            |
| <b>Histology of IPLC</b>         |                                |
| Adenocarcinoma                   | Reference                      |
| Large cell                       | 1.46 (0.92 to 2.33)            |
| Squamous cell                    | 1.00 (0.81 to 1.23)            |
| Small cell                       | 3.82 (1.71 to 8.49)            |
| Non-small cell carcinoma/NOS     | 1.41 (0.85 to 2.32)            |
| Others                           | 0.92 (0.66 to 1.28)            |
| <b>Race</b>                      |                                |
| African American                 | 1.24 (0.98 to 1.58)            |
| Hispanic                         | 0.96 (0.71 to 1.29)            |
| Japanese American                | 0.87 (0.68 to 1.12)            |
| Native Hawaiian                  | 0.71 (0.46 to 1.09)            |
| Other                            | 1.26 (0.88 to 1.79)            |
| White                            | Reference                      |

<sup>a</sup>Time-varying predictor for overall survival. IPLC, initial primary lung cancer; MEC, Multiethnic Cohort Study; NOS, not otherwise specified; SPLC, second primary lung cancer.

<sup>b</sup>Stage of IPLC was defined using SEER summary stage: 'localized' and 'regional' for early stage and 'distant' for advanced stage.

**Supplementary Table 9. Sensitivity Analysis for Evaluating an Association Between SPLC and Survival Stratified by Smoking-Related Subgroups for Assessing Effect Modification in the MEC**

| Outcome and Subgroup                      | Case | aHR of SPLC <sup>a</sup> (95% CI) | <i>P</i> <sub>interaction</sub> <sup>e</sup> |
|-------------------------------------------|------|-----------------------------------|----------------------------------------------|
| Overall survival                          |      |                                   |                                              |
| Smoking status <sup>b</sup>               |      |                                   |                                              |
| Never                                     | 233  | 1.28 (0.48 to 3.35)               | 0.13                                         |
| Former                                    | 750  | 1.45 (0.99 to 2.14)               |                                              |
| Current                                   | 557  | 2.32 (1.49 to 3.61)               |                                              |
| Smoking pack-years <sup>c</sup>           |      |                                   |                                              |
| 1 <sup>st</sup> Tertile (1 to 17)         | 368  | 1.61 (0.87 to 2.98)               | 0.92                                         |
| 2 <sup>nd</sup> Tertile (18 to 34)        | 476  | 1.94 (1.16 to 3.24)               |                                              |
| 3 <sup>rd</sup> Tertile (≥35)             | 418  | 1.60 (1.03 to 2.48)               |                                              |
| Smoking intensity (Cigs/Day) <sup>c</sup> |      |                                   |                                              |
| 1 <sup>st</sup> Tertile (5 to 9)          | 327  | 1.65 (0.91 to 3.00)               | 0.20                                         |
| 2 <sup>nd</sup> Tertile (10 to 19)        | 514  | 2.25 (1.29 to 3.93)               |                                              |
| 3 <sup>rd</sup> Tertile (≥20)             | 437  | 1.66 (1.08 to 2.56)               |                                              |
| Smoking quit years <sup>d</sup>           |      |                                   |                                              |
| 1 <sup>st</sup> Tertile (0.5 to 7)        | 192  | 1.46 (0.78 to 2.72)               | 0.38                                         |
| 2 <sup>nd</sup> Tertile (8 to 14)         | 313  | 1.36 (0.74 to 2.47)               |                                              |
| 3 <sup>rd</sup> Tertile (≥15)             | 233  | 2.32 (1.06 to 5.11)               |                                              |
| Lung Cancer-Specific Survival             |      |                                   |                                              |
| Smoking status <sup>b</sup>               |      |                                   |                                              |
| Never                                     | 233  | 1.97 (0.73 to 5.31)               | 0.04                                         |
| Former                                    | 750  | 1.52 (0.90 to 2.54)               |                                              |
| Current                                   | 557  | 3.14 (1.83 to 5.36)               |                                              |
| Smoking pack-years <sup>c</sup>           |      |                                   |                                              |
| 1 <sup>st</sup> Tertile (1 to 17)         | 368  | 2.08 (0.92 to 4.69)               | 0.68                                         |
| 2 <sup>nd</sup> Tertile (18 to 34)        | 476  | 2.77 (1.52 to 5.07)               |                                              |
| 3 <sup>rd</sup> Tertile (≥35)             | 418  | 1.83 (1.04 to 3.21)               |                                              |
| Smoking intensity (Cigs/Day) <sup>c</sup> |      |                                   |                                              |
| 1 <sup>st</sup> Tertile (5 to 9)          | 327  | 1.86 (0.80 to 4.34)               | 0.19                                         |
| 2 <sup>nd</sup> Tertile (10 to 19)        | 514  | 3.38 (1.73 to 6.60)               |                                              |
| 3 <sup>rd</sup> Tertile (≥20)             | 437  | 2.13 (1.27 to 3.56)               |                                              |
| Smoking quit years <sup>d</sup>           |      |                                   |                                              |
| 1 <sup>st</sup> Tertile (0.5 to 7)        | 192  | 1.90 (0.86 to 4.17)               | 0.95                                         |
| 2 <sup>nd</sup> Tertile (8 to 14)         | 313  | 1.54 (0.65 to 3.63)               |                                              |
| 3 <sup>rd</sup> Tertile (≥15)             | 233  | 1.42 (0.44 to 4.58)               |                                              |

<sup>a</sup>Time-varying predictor for overall survival. aHR, adjusted hazard ratio; IPLC, initial primary lung cancer; MEC, the Multiethnic Cohort Study; NOS, not otherwise specified; SEER, Surveillance, Epidemiology, and End Results Program; SPLC, second primary lung cancer.

<sup>b</sup>Assessment of smoking status was collected at baseline, and updated using 10-year follow-up, if prior to IPLC diagnosis.

<sup>c</sup>Only among ever smokers at IPLC diagnosis (n=1,278).

<sup>d</sup>Only among former smokers at IPLC diagnosis (n=738).

<sup>e</sup>2-sided likelihood ratio test comparing models with and without interaction with SPLC.

## Supplementary Figures

**Supplementary Figure 1. Cohort Selection Criteria from the SEER database (Panel A) and MEC (Panel B).** MEC = Multiethnic Cohort Study; SEER = Surveillance, Epidemiology, and End Results Program.

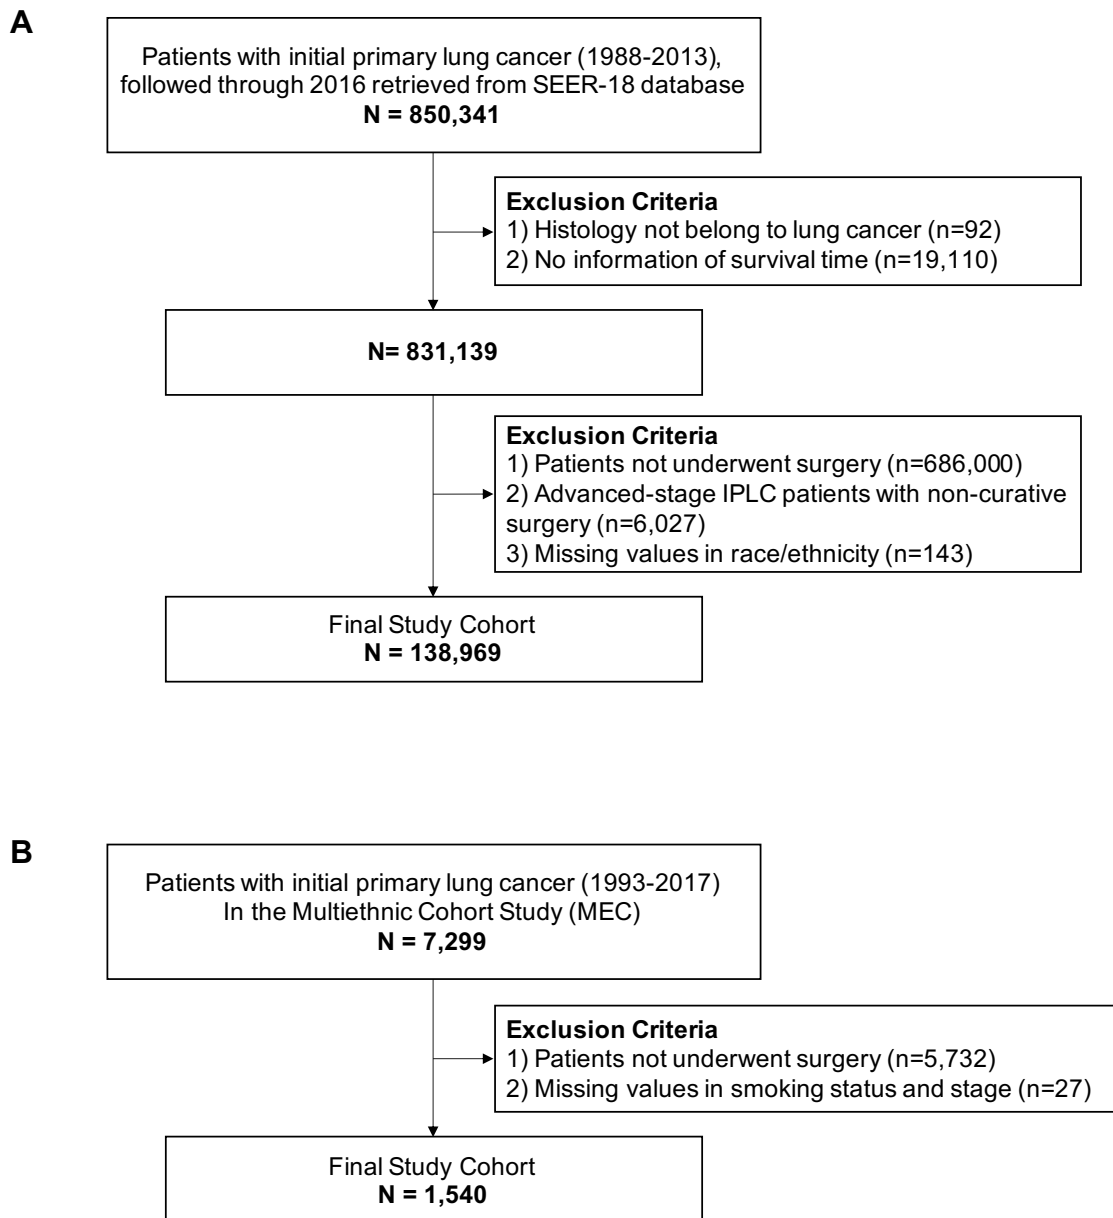

**Supplementary Figure 2. Histogram for Time from IPLC to SPLC diagnosis in SEER.** IPLC = initial primary lung cancer; SEER = Surveillance, Epidemiology, and End Results Program; SPLC = second primary lung cancer.

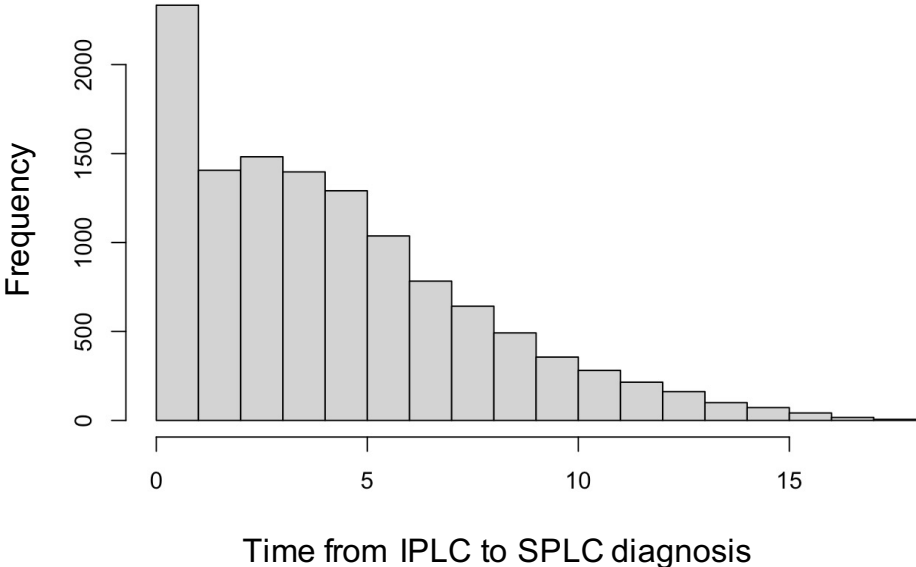

**Supplementary Figure 3. Adjusted Survival Curves for Overall and Lung Cancer-Specific Mortality among Patients with SPLC versus Single Primary Lung Cancer in SEER.** Overall mortality (A) and lung cancer-specific mortality (B) was estimated using multivariable Cox regression with time varying SPLC adjusting for sex, race, and age, stage and histology at IPLC. IPLC = initial primary lung cancer; SEER = Surveillance, Epidemiology, and End Results Program; SPLC = second primary lung cancer; CI = confidence interval; HR = adjusted hazard ratio

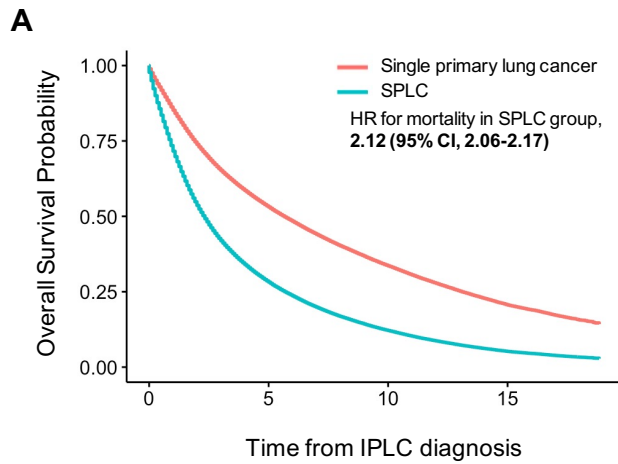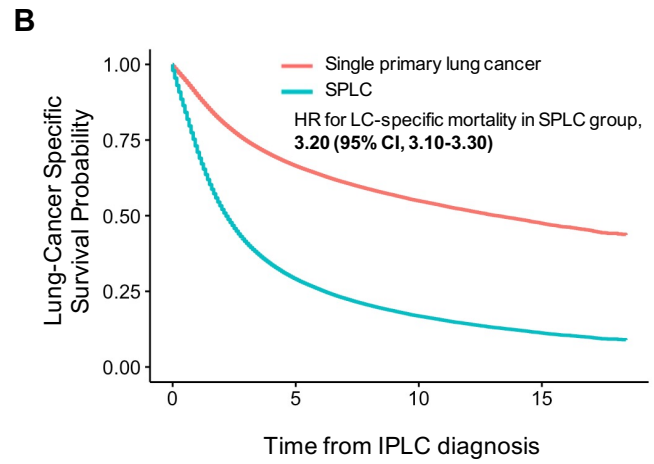

**Supplementary Figure 4. Stratified Analysis by IPLC diagnosis age: Adjusted Survival Curves for Overall Mortality among Patients with SPLC<sup>a</sup> versus Single Primary Lung Cancer in SEER** <sup>a</sup>Overall mortality was estimated using multivariable Cox regression with time varying SPLC adjusting for sex, race, and age, stage and histology at IPLC. <sup>b</sup>Interaction was assessed between age group at IPLC diagnosis and SPLC diagnosis on overall survival using a 2-sided likelihood ratio test. CI = confidence interval; HR = adjusted hazard ratio; IPLC = initial primary lung cancer; SEER = Surveillance, Epidemiology, and End Results Program; SPLC = second primary lung cancer.

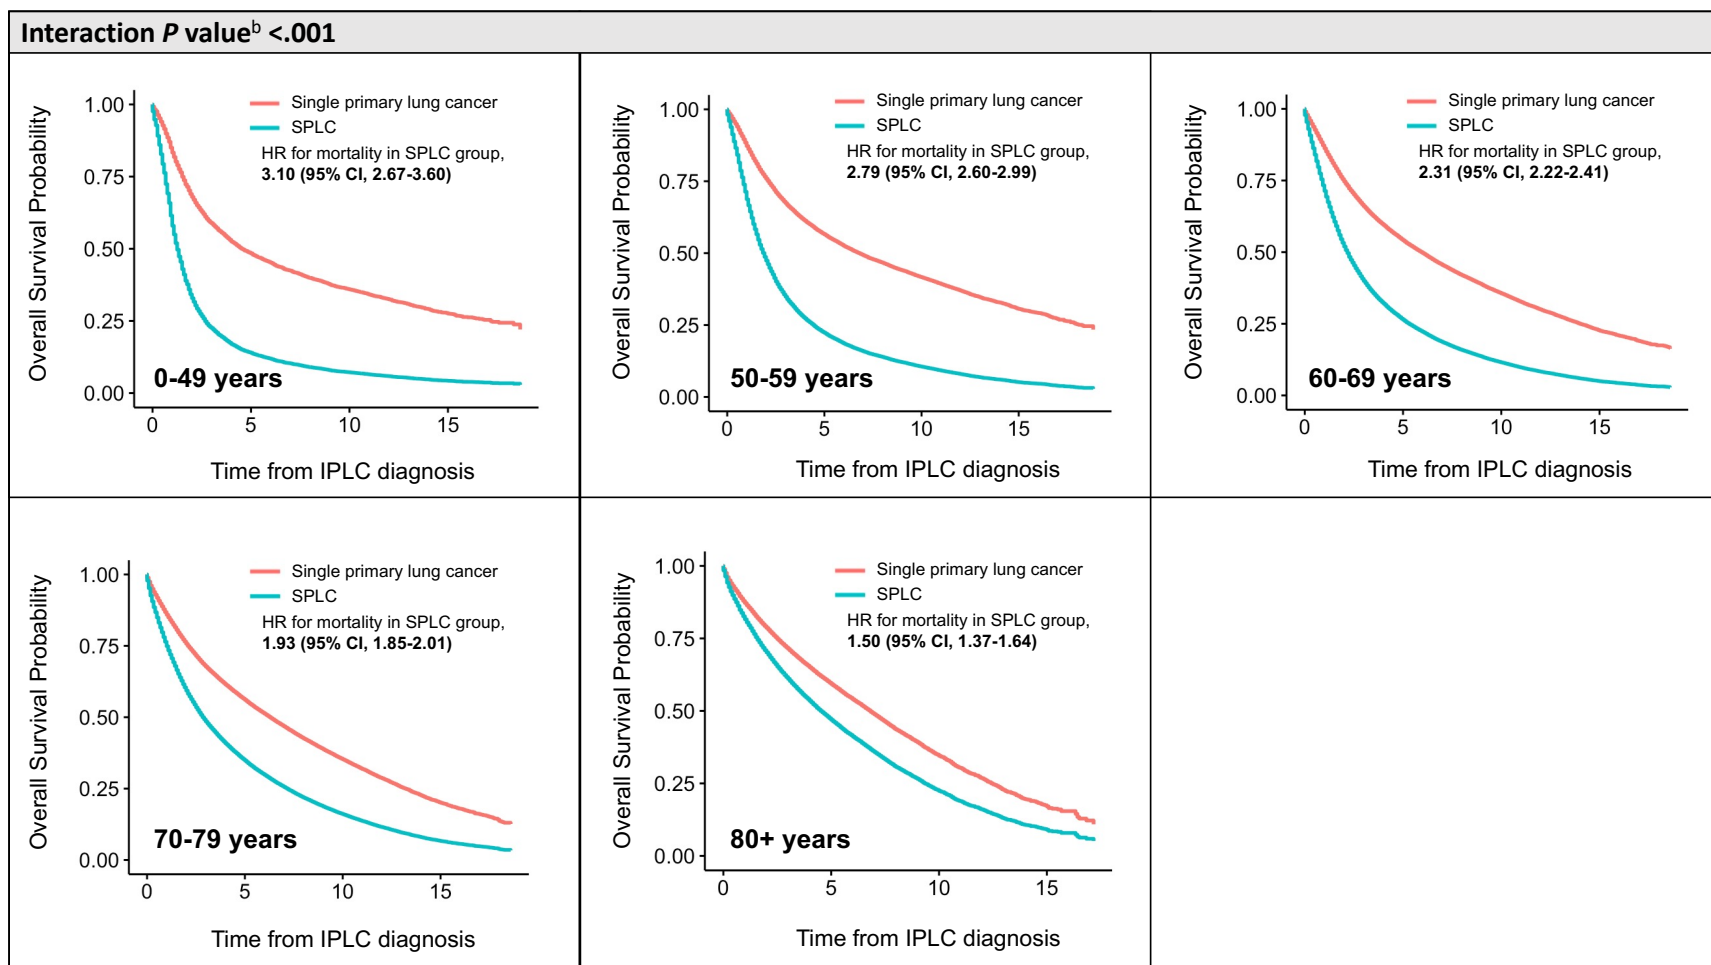

**Supplementary Figure 5. Stratified Analysis by IPLC Histology: Adjusted Survival Curves for Overall Mortality among Patients with SPLC<sup>a</sup> versus Single Primary Lung Cancer in SEER**

<sup>a</sup>Overall mortality was estimated using multivariable Cox regression with time varying SPLC adjusting for sex, race, and age, stage and histology at IPLC. <sup>b</sup>Interaction was assessed between IPLC Stage and SPLC diagnosis on overall survival using a 2-sided likelihood ratio test. AD = adenocarcinoma; CI = confidence interval; HR = adjusted hazard ratio; IPLC = initial primary lung cancer; LC = large cell; NSCLC-NOS = non-small cell lung cancer/not otherwise specified; OTH = other; SC = small cell lung cancer; SEER = Surveillance, Epidemiology, and End Results Program; SPLC = second primary lung cancer; SQ = squamous cell.

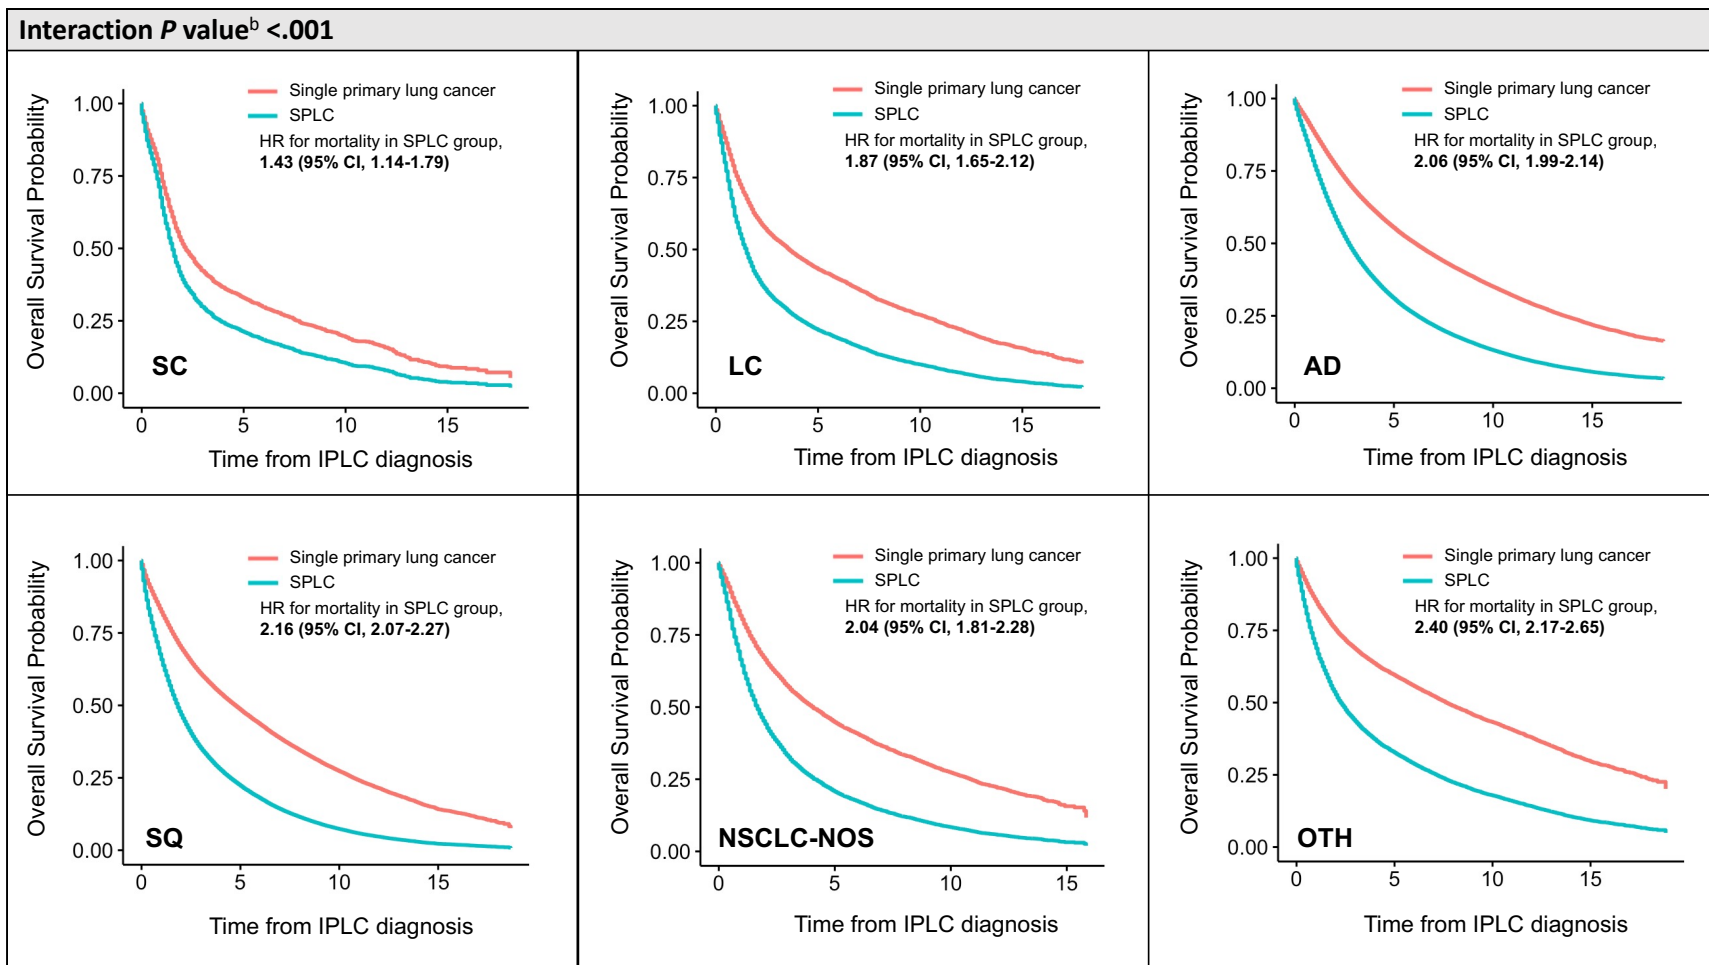



**Supplementary Figure 6. Sensitivity Analysis for Forest Plot of Association between Survival and SPLC diagnosis (versus Single Primary Lung Cancer) after Excluding Patients with Advanced-Stage IPLC in Multivariable Cox Regression in (A) SEER (N=133,445) and (B) MEC (N=1,050)<sup>a</sup>.** <sup>a</sup>Overall and lung cancer-specific mortality was estimated using multivariable Cox regression adjusting for sex, race, and age, stage and histology at IPLC. <sup>b</sup>Time-varying predictor for overall and lung cancer-specific survival. Square symbols indicate the estimate of hazard ratio. Error bars indicate the 95% confidence intervals (CIs). CI = confidence interval; HR = adjusted hazard ratio; SPLC = second primary lung cancer.

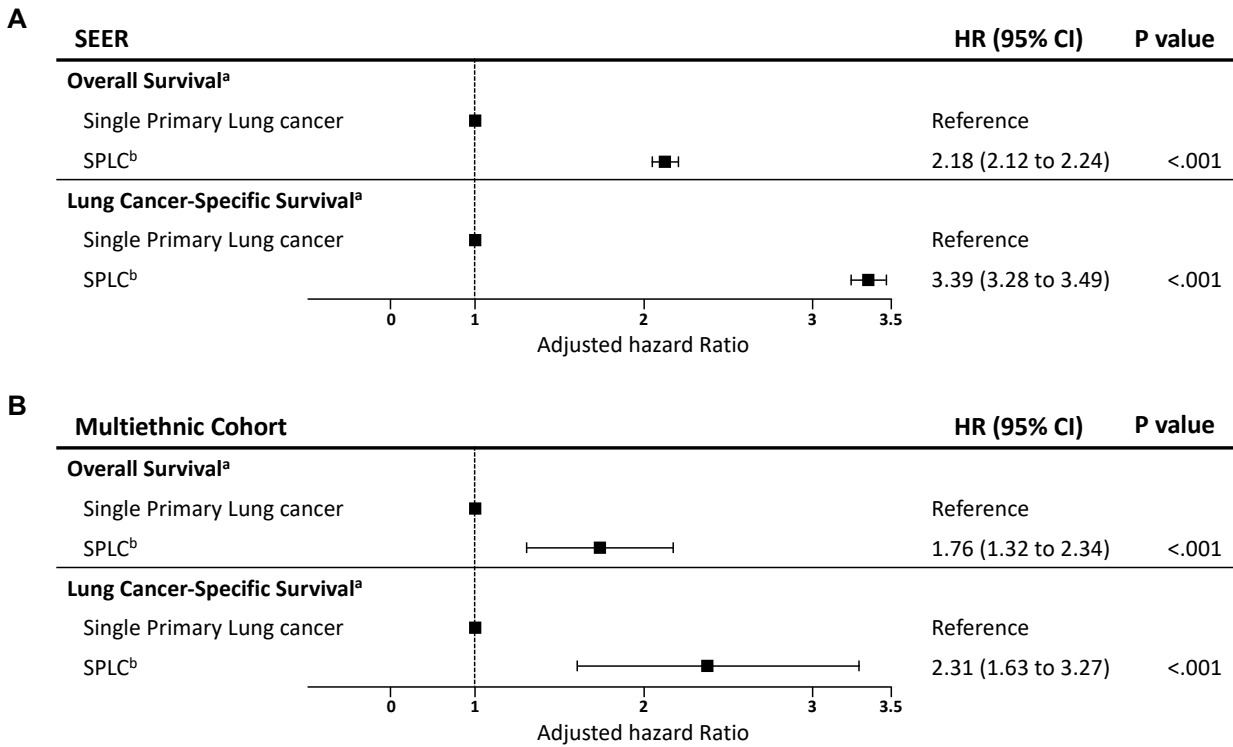

### Supplementary Figure 7. Adjusted Survival Curves for Overall and Lung Cancer-Specific Mortality among Patients with SPLC<sup>a</sup> versus Single Primary Lung Cancer in the MEC

<sup>a</sup>Overall mortality (A) and lung cancer-specific mortality (B) was estimated using multivariable Cox regression with time varying SPLC adjusting for sex, race, and age, stage and histology at IPLC. CI = confidence interval; HR = adjusted hazard ratio; IPLC = initial primary lung cancer; MEC = Multiethnic Cohort Study; SPLC = second primary lung cancer.

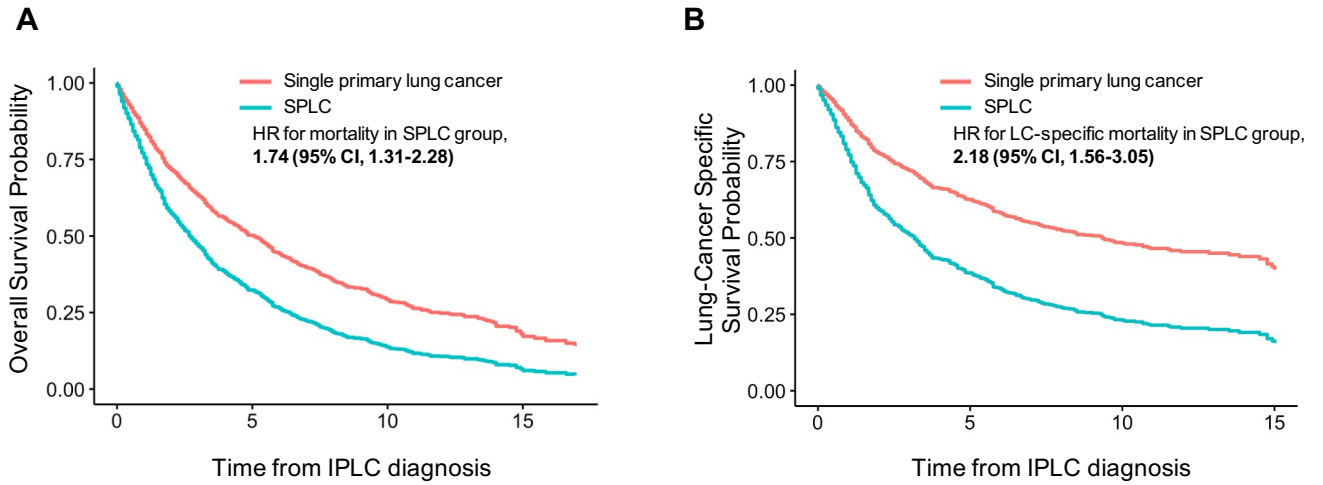

**Supplementary Figure 8. Stratified Analysis by Smoking Status at Initial Diagnosis: Adjusted Survival Curves for Overall among Patients with SPLC<sup>a</sup> versus Single Primary Lung Cancer, Stratified by Smoking Status, in the MEC**

<sup>a</sup>Overall mortality was estimated using multivariable Cox regression with time varying SPLC adjusting for sex, race, and age, stage and histology at IPLC.

<sup>b</sup>Interaction was assessed between smoking status and SPLC diagnosis on overall survival using a 2-sided likelihood ratio test. CI = confidence interval; HR = adjusted hazard ratio; IPLC = initial primary lung cancer; MEC = Multiethnic Cohort Study; SPLC = second primary lung cancer.

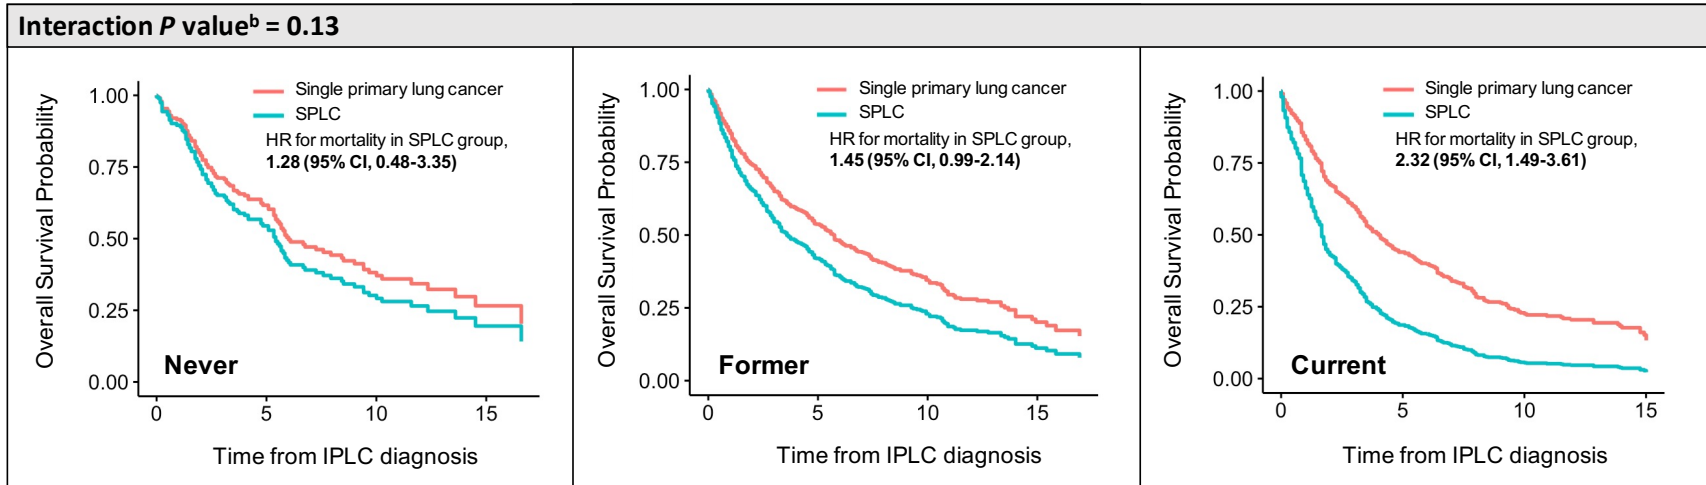

Supplement: djab224_supplementary_data.pdf [file djab224_supplementary_data.pdf]
